# 1 Analysis of 19 Highly Conserved *Vibrio cholerae* 2 Bacteriophages Isolated from Environmental and 3 Patient Sources Over a Twelve-Year Period

4 Angus Angermeyer<sup>1</sup>, Moon Moon Das<sup>2</sup>, Durg Vijai Singh<sup>2</sup> and Kimberley D. Seed<sup>1,3,\*</sup>

5 <sup>1</sup> Department of Plant and Microbial Biology, University of California Berkeley, Berkeley, CA, USA;  
6 [angermeyer@berkeley.edu](mailto:angermeyer@berkeley.edu) (A.A.); [kseed@berkeley.edu](mailto:kseed@berkeley.edu) (K.D.S.)

7 <sup>2</sup> Department of Infectious Disease Biology, Institute of Life Sciences, Nalco Square, Bhubaneswar 751023,  
8 India; [moon.scial@gmail.com](mailto:moon.scial@gmail.com) (M.M.D.); [durg.singh@gmail.com](mailto:durg.singh@gmail.com) (D.V.S.)

9 <sup>3</sup> Chan Zuckerberg Biohub, San Francisco, CA, USA; [kseed@berkeley.edu](mailto:kseed@berkeley.edu)

10 \* Correspondence: [kseed@berkeley.edu](mailto:kseed@berkeley.edu); Tel.: +1-510-664-7711

11

12 **Abstract:** The *Vibrio cholerae* biotype 'El Tor' is responsible for all current epidemic and endemic  
13 cholera outbreaks worldwide. These outbreaks are clonal and are hypothesized to originate from  
14 the coastal areas near the Bay of Bengal where the lytic bacteriophage ICP1 specifically preys upon  
15 these pathogenic outbreak strains. ICP1 has also been the dominant bacteriophage found in  
16 cholera patient stool since 2001. However, little is known about its genomic differences between  
17 ICP1 strains collected over time. Here we elucidate the pan-genome and phylogeny of ICP1 strains  
18 by aligning, annotating and analyzing the genomes of 19 distinct isolates collected between 2001  
19 and 2012. Our results reveal that ICP1 isolates are highly conserved and possess a large  
20 core-genome as well as a smaller, somewhat flexible accessory-genome. Despite its overall  
21 conservation, ICP1 strains have managed to acquire a number of unknown genes as well as a  
22 CRISPR-Cas system, which is known to be critical for its ongoing struggle for co-evolutionary  
23 dominance over its host. This study describes a foundation on which to construct future molecular  
24 and bioinformatic studies of this *V. cholerae*-associated bacteriophages.

25 **Keywords:** Cholera; Bacteriophage; *Vibrio cholerae*; Pan-genome; Myovirus; Phylogenetics; *Vibrio*  
26 phage

27

---

## 28 1. Introduction

29 *Vibrio cholerae* is a globally-distributed bacterium and the causal agent of the disease cholera, a  
30 potentially severe intestinal illness that affects ~1-5 million people resulting in up to ~140,000 deaths  
31 annually [1]. The current (seventh) pandemic is comprised of *V. cholerae* biotype 'El Tor'  
32 (predominantly serotype O1) and is responsible for current endemic and epidemic disease [2].  
33 Epidemic disease outbreaks sweep the globe periodically and have been traced back to a single  
34 lineage that has emerged from the Bay of Bengal region in multiple waves over the last half-century  
35 [3]. Despite the overall genetic heterogeneity of this lineage, in which individual outbreaks are  
36 nearly always clonal [4], there is an abundance of subtle variation and horizontal transfer that has  
37 been observed between outbreaks over time [5,6]. It is hypothesized that the Bay of Bengal serves as  
38 a reservoir where El Tor strains circulate throughout the year exchanging genetic material and  
39 undergoing ecological selection before infiltrating coastal communities. They are subsequently  
40 transported by infected individuals to larger cities where they can be transmitted globally [5,7]. This  
41 mechanism is thought to create a bottleneck for strains and result in the clonality of outbreaks.

42 Bacteriophage, viruses that uniquely infect bacteria, are extremely abundant in the  
43 environment where they can outnumber their prokaryotic hosts by several orders of magnitude [8].  
44 As such, bacteriophage play a key role in the evolution of their hosts through both selection and  
45 phage-mediated lateral gene transfer [9]. These processes are likely to be very important to *V.*  
46 *cholerae* strain evolution in the Bay of Bengal as well. Previous work has identified a *V. cholerae*

47 O1-specific [10] lytic *myoviridae* bacteriophage (ICP1) to be of particular interest in this system [11].  
48 In Bangladesh, ICP1 has been found in water samples [12,13] and it has been identified as the  
49 dominant phage in cholera patient stool samples since 2001 [11]. The persistence of this phage over  
50 time indicates that *V. cholerae* has strategies to limit ICP1 predation, and that ICP1 can evolve to  
51 overcome such defenses. Indeed, from this natural genetic laboratory, several complex and  
52 surprising adaptations/acquisitions have occurred in the race for survival between *V. cholerae* and  
53 ICP1. These include self-mobilizing chromosomal islands that can provide a rapid and efficient  
54 response to ICP1 infection [14] and the first known example of a bacteriophage-encoded  
55 CRISPR-Cas system [15]. Initial characterization of eight ICP1 isolates collected between 2001-2011  
56 noted the relative low level of diversity and lack of major genomic rearrangements, deletions or  
57 insertions [11] (with the exception of its remarkable CRISPR-Cas acquisition [15]). Here we build  
58 upon the initial characterization of ICP1 to perform a comparative genomic analysis on 19  
59 individual ICP1 isolates to reconstruct their phylogenetic relationships over time, identify the core  
60 and accessory genomes, and infer possible gene function where possible.

61 *V. cholerae* is an organism that affects millions and appropriately, it is well-studied with  
62 modern bioinformatic and sequencing tools. It is important that their concomitant bacteriophage  
63 are similarly studied to help us better elucidate the important role that bacteriophage likely play in  
64 the evolution of *V. cholerae* and the epidemiology of the ongoing cholera pandemic.  
65

## 66 2. Materials and Methods

67 Nineteen ICP1 bacteriophage genomes were acquired from various sources (Table 1). Those  
68 genomes not specifically described below were downloaded from the NCBI GenBank database.  
69 Their metadata (if available) were used to inform our reporting of isolation source and isolation  
70 year. In cases where this information differed from what was reported in a genome's original  
71 publication we deferred to the GenBank database. Isolation year was used to standardize the ICP1  
72 bacteriophage naming convention: ICP1\_YEAR\_X where "X" is sequentially assigned letter (A-Z)  
73 based on the order in which genomes were named. The only exception is the original, 'ancestral'  
74 ICP1 isolate, which is simply referred to as 'ICP1' [11].

75 Genomes not already available on GenBank include: ICP1\_2006\_E and ICP1\_2011\_A, which  
76 were isolated and sequenced as described previously [15]. ICP1\_2011\_A was assembled using CLC  
77 Genomics Workbench v10 (Qiagen, Redwood City, CA) and ICP1\_2006\_E was assembled with  
78 IDBA-UD v1.1.3 [16] (default settings) after fastq read filtering with USEARCH v10.0.240 [17]  
79 fastq\_filter (-fastq\_maxee\_rate 0.001 -fastq\_maxns 1 -fastq\_truncqual 15 -fastq\_maxee 0.25).  
80 ICP1\_2011\_B was assembled from an existing diarrheal stool metagenomic sample [18] (SRA:  
81 PRJEB9150; Run: ERR866578) using USEARCH filtering and IDBA-UD *de novo* assembly as above  
82 (same parameters) to generate an incomplete ICP1 contig. That contig was then used as a reference  
83 sequence to reassemble the same filtered reads using IDBA-Hybrid [16] with default settings.  
84 Finally, ICP1\_2012\_A was isolated from a cholera patient stool sample collected in Silvassa, India  
85 [19]. Genomic DNA libraries were sequenced using an Illumina Mi-Seq (Genotypic Technology,  
86 Bangalore, India). Genome assembly was performed with CLC Genomics Workbench v10.

87 Whole-genome alignment was performed on all 19 genomes using progressiveMauve [20]  
88 (build: Feb 25 2015) with default settings. The Mauve xmfa alignment output file was converted to  
89 Phylip format using BioPython v1.71 [21] and a maximum likelihood, unrooted, phylogenetic tree  
90 was constructed using PhyML v20120412 [22] while calculating bootstrap support (-s BEST  
91 --rand\_start --n\_rand\_starts 10 -b 100). A companion phylogeny based on the concatenated  
92 core-genome (described below) was constructed using the same methods. Dendroscope3 v3.5.9 [23]  
93 was used to generate a tanglegram joining both trees with ICP1 ancestral set as the outgroup. The  
94 whole-genome alignment was also used to determine a consensus ICP1 sequence using CLC  
95 Genomics Workbench v10, which all ICP1 genomes were visually mapped back onto using BRIG  
96 v0.95 [24].

97 All extant CDS annotations, hereafter referred to as ‘Open Reading Frames’ (ORFs), in the ICP1  
 98 ancestral GenBank file were blasted (BLASTn v2.6.0 [25]) against every other ICP1 genomic  
 99 sequence to find homologous ORFs. Putative hits were considered homologs, and annotated as  
 100 such, if the following conditions were met: the subject hit was a complete ORF (start and stop  
 101 codons; codon table=11),  $e\text{-value} \leq 1e-10$ ,  $\%identity \geq 85$ , and the two matched ORFs were within 10%  
 102 sequence length of each other. After identifying existing homologs, *de novo* ORF prediction was  
 103 performed on all genomes to find additional possible coding sequences using Prodigal v2.6.3 [26]  
 104 with default settings and a confidence cutoff  $\geq 95\%$ . All newly identified putative-ORFs from each  
 105 genome were then blasted against each other with the same conditions as above, grouped by  
 106 homology and given an iterative numerical identifier based on their locations in the genome  
 107 relative to the extant ORFs (i.e. ORF1, ORF2, ORF2.1, ORF2.2, ORF3, etc.). ORFs were then  
 108 categorized into groups based on how many of the 19 genomes they were found in. If an ORF was  
 109 present in all 19 genomes, it was considered part of the core-genome, otherwise, it was considered  
 110 part of the accessory-genome. Core and accessory ORFs were also mapped to the BRIG alignment.  
 111 The core-genome ORF protein sequences were concatenated by strain to create a core-genomic,  
 112 pseudo-genome for each ICP1 strain and subjected to the phylogenetic analysis as above. The core  
 113 and accessory ORFs were also queried against the NCBI’s Conserved Domain Database  
 114 (<https://www.ncbi.nlm.nih.gov/cdd>) to determine if any possessed interesting domain homology  
 115 that wasn’t detected by BLAST alone.

116  
 117

Table 1. ICP1 bacteriophage strains.

| Standardized Name | Previous Name | Isolation Year | Isolation Source | Genome Size (bp) | GenBank Accession | Genome Citation          |
|-------------------|---------------|----------------|------------------|------------------|-------------------|--------------------------|
| ICP1              | -             | 2001           | Stool            | 125,956          | HQ641347          | Seed <i>et al.</i> 2011  |
| ICP1_2001_A       | -             | 2001           | Stool            | 124,826          | HQ641353          | Seed <i>et al.</i> 2011  |
| ICP1_2001_B       | JSF1          | 2001           | Water            | 126,082          | KY883636          | Naser <i>et al.</i> 2017 |
| ICP1_2001_C       | JSF2          | 2001           | Water            | 126,082          | KY883637          | Naser <i>et al.</i> 2017 |
| ICP1_2001_D       | JSF4          | 2001*          | Water*           | 124,261          | KY065147          | Naser <i>et al.</i> 2017 |
| ICP1_2001_E       | JSF5          | 2001*          | Water            | 132,142          | KY883634          | Naser <i>et al.</i> 2017 |
| ICP1_2001_F       | JSF6          | 2001*          | Water            | 133,685          | KY883635          | Naser <i>et al.</i> 2017 |
| ICP1_2004_A       | -             | 2004           | Stool            | 128,083          | HQ641354          | Seed <i>et al.</i> 2011  |
| ICP1_2005_A       | -             | 2005           | Stool            | 129,373          | HQ641352          | Seed <i>et al.</i> 2011  |
| ICP1_2006_A       | -             | 2006           | Stool            | 123,104          | HQ641351          | Seed <i>et al.</i> 2011  |
| ICP1_2006_B       | -             | 2006           | Stool            | 123,097          | HQ641350          | Seed <i>et al.</i> 2011  |
| ICP1_2006_C       | -             | 2006           | Stool            | 124,497          | HQ641349          | Seed <i>et al.</i> 2011  |
| ICP1_2006_D       | -             | 2006           | Stool            | 124,497          | HQ641348          | Seed <i>et al.</i> 2011  |
| ICP1_2006_E       | -             | 2006           | Stool            | 128,298          | TBD               | This study               |
| ICP1_2009_A       | JSF13         | 2009           | Water            | 128,814          | KY883638          | Naser <i>et al.</i> 2017 |
| ICP1_2011_A       | -             | 2011           | Stool            | 126,861          | TBD               | This study               |
| ICP1_2011_B       | -             | 2011           | Stool            | 125,128          | TBD               | This study               |
| ICP1_2011_C       | JSF14         | 2011           | Water            | 125,096          | KY883639          | Naser <i>et al.</i> 2017 |
| ICP1_2012_A       | -             | 2012           | Stool            | 121,418          | TBD               | This study               |

118

\* GenBank metadata was reported in cases where it differed from the original publication.

119

## 120 3. Results

### 121 3.1. Genome Characteristics and Phylogeny

122 ICP1 genomes were analyzed from isolates collected over a 12-year period, from 2001 to 2012  
123 (Table 1). The isolates were derived from both environmental water samples and patient stool  
124 samples collected in Bangladesh (n=18) and India (ICP1\_2012\_A). Genome length was slightly  
125 variable with an average of 126,384bp (stdev: 3008bp). The maximum likelihood phylogenetic  
126 analysis grouped both the whole-genome and core-genome alignments into several general clusters  
127 (Figure 1). Cluster A contains the five most recently isolated strains as well as ICP1\_2004\_A. This  
128 cluster also contains five of the seven total CRISPR-positive strains in the dataset. Cluster B contains  
129 four of the six 2001 isolates, ICP1\_2006\_E and two of the CRISPR-positive strains. Clusters C and D  
130 contain isolates from intermediate years 2005 and 2006, with one CRISPR-positive represented in  
131 cluster C. The CRISPR-positive strain ICP1\_2001\_F did not cluster with other isolates. ICP1  
132 ancestral and ICP1\_2001C also cluster closely together but are not specifically highlighted.

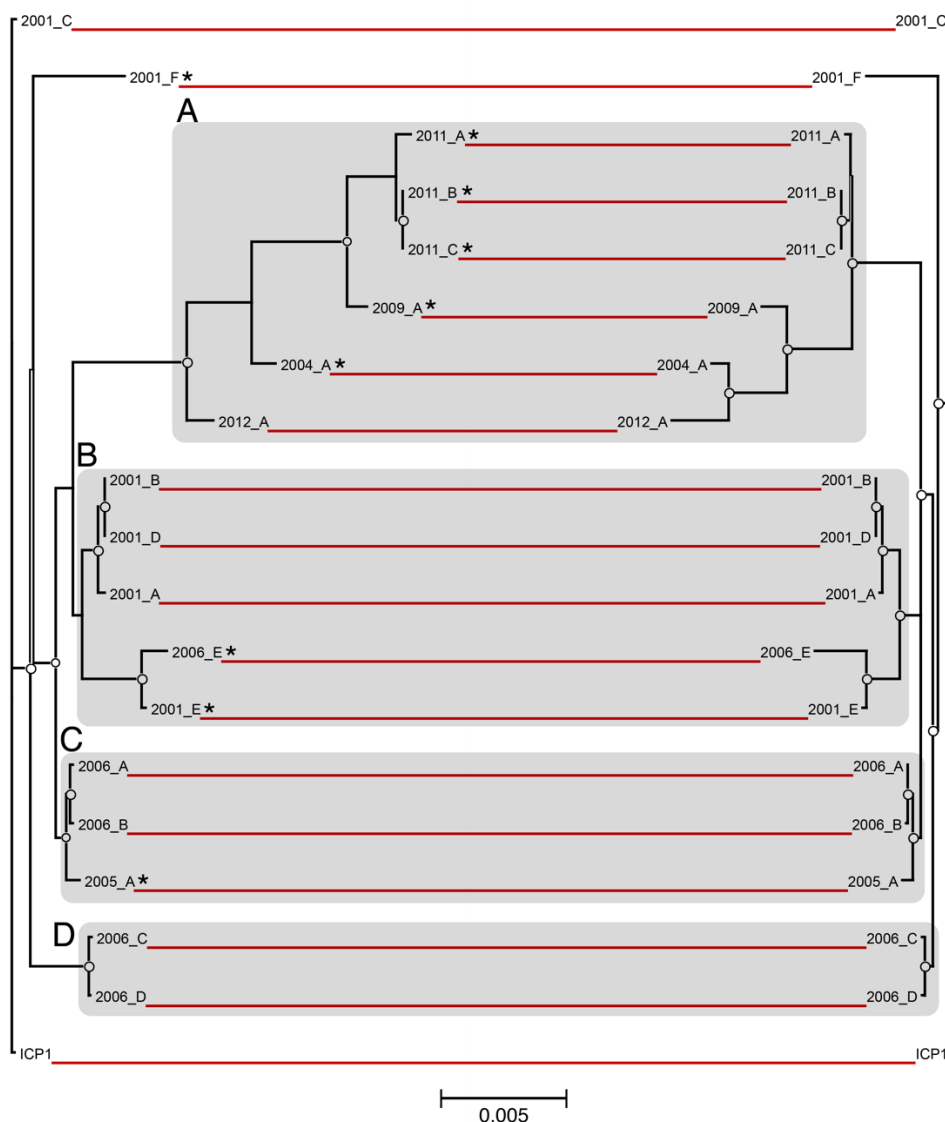

133  
134  
135  
136  
137  
138  
139  
140

**Figure 1.** Phylogenetic comparison of ICP1 whole and core-genomes. Maximum likelihood phylogenetic trees (unrooted) were constructed based on a multiple whole-genome alignment of all 19 ICP1 phage sequences (left) as well as an alignment of the concatenated ORFs for each phage that comprise the core genome (right). The red lines connect identical leaves between trees to indicate relative phylogeny. The circles represent nodes with  $\geq 90\%$  bootstrap support (n=100). The scale bar measures nucleotide substitutions per base pair. Distinct phylogenetic clusters are shaded grey and CRISPR strains are marked with '\*'.

141 Overall, the topologies between whole-genome and core-genome trees were highly similar  
142 with a few minor exceptions. Both share identical clustering and have almost no leaf-level  
143 differences within clusters B, C and D. Cluster A showed an inversion of the phylogenetic  
144 differences of the leaves between the two alignments. For instance, ICP1\_2012\_A has the most  
145 divergent core-genome (from all other strains) but is the least divergent within its cluster when  
146 the whole-genome was considered.

### 147 3.2. Genome Alignment Visualization

148 The consensus genomic sequence constructed from the whole-genome alignment was  
149 151,832bp long and contained all of the coding and non-coding regions from each genome. It  
150 was used as a reference to map the genomes and visualize the overall multiple-genome  
151 alignment (Figure 2). Variable regions of insertions and deletions were visible as gaps in the  
152 circular alignment. Similar to the whole-genome phylogeny, there was not a clear progression  
153 of sequence divergence based on isolation chronology. No large regions of GC content  
154 difference were observed.  
155

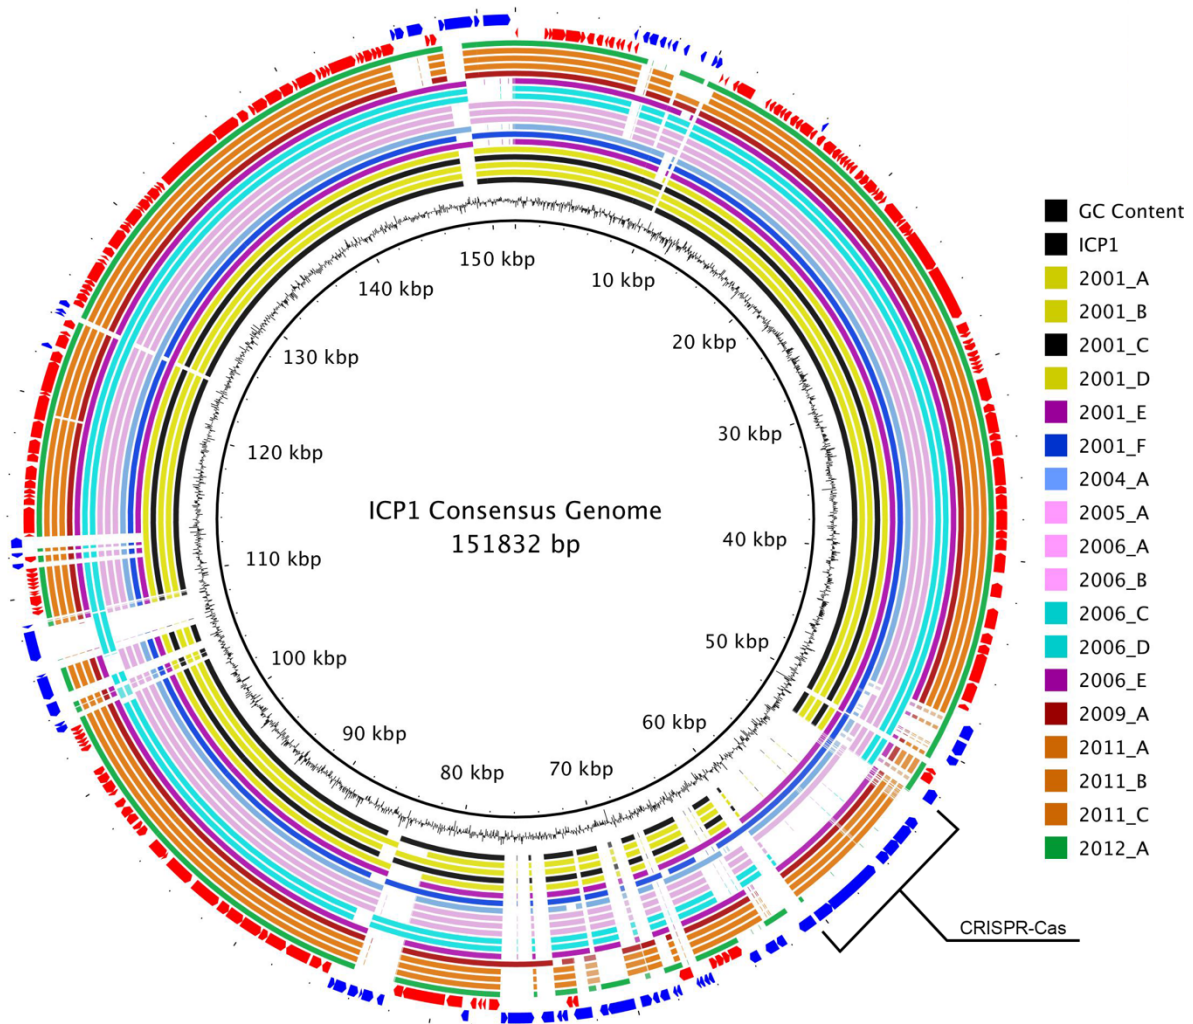

156  
157 **Figure 2.** ICP1 pan-genome consensus alignment. A BLASTn-based whole genome alignment of all 19  
158 ICP1 phage genomes using the MAUVE alignment consensus sequence as reference. The innermost  
159 ring is the consensus sequence. The next ring represents the GC content for that region. The following  
160 19 rings display the alignment for each genome and are colored by phylogenetic similarity as  
161 determined by analysis of whole genomes (Figure 1 left). The second to last ring (red) represents the  
162 core-genomic ORFs while the outermost ring (blue) is the accessory-genome ORFs. The CRISPR-Cas  
163 insertion region is labeled.

164 3.3. ORF Annotation

165 Among all 19 genomes, a total of 269 distinct ORFs (based on homology cutoffs) were  
166 identified. Of these, 230 were originally annotated in the ICP1 ancestral genome and 39 were  
167 called by Prodigal. The number of ORFs per genome varied from 215 to 232 and demonstrated  
168 a slight but significant inverse relationship with year of isolation, i.e. more recent strains had  
169 fewer ORFs (Figure S1A). A weaker significant positive trend was observed between number  
170 of ORFs and genome length (Figure S1B) which is likely due to the CRISPR-Cas insertions,  
171 however there was not a statistically significant correlation between genome length and  
172 isolation year.

173 3.3. Core and Accessory Genome Analysis

174 To estimate gene diversity among the genomes we divided the total pan-genomic ORF  
175 complement into core and accessory groups. The core ORFs, those that were found in all 19  
176 genomes, comprised ~70% of the total number of ORFs (185 out of 269) while the other 84 ORFs  
177 were considered to be accessory (Figure 3).

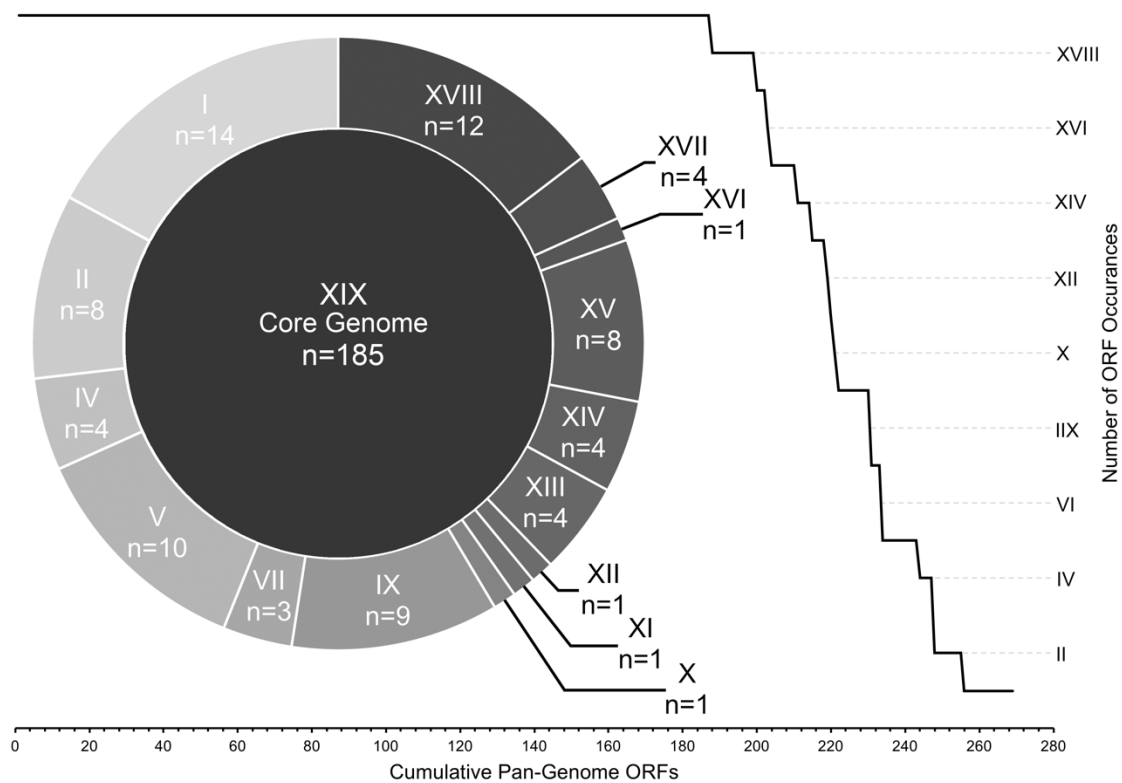

178

179 **Figure 3.** ICP1 pan-genome ORF allocation. All ICP1 ORFs arranged by number of genomes in  
180 which they were detected. ORF bins are represented by roman numerals, i.e. 'XIX' ORFs were found  
181 in all 19 genomes (core), 'X' ORFs were found in exactly 10 genomes, etc. The line graph  
182 demonstrates the overall cumulative curve of core and accessory ORF prevalence. The doughnut  
183 chart provides exact number of ORFs within each accessory bin.

184 Despite their occurrence across all genomes in this study, the core-genome ORFs were not all  
185 equally conserved at the sequence level. By comparing average pairwise nucleotide and amino acid  
186 sequence identity, we were able to resolve the core ORFs into three distinct groups: conserved-core,  
187 synonymous-core and divergent-core (Figure 4). The conserved-core was comprised of 49 ORFs  
188 that shared perfect sequence identity among all the genomic sequences. Correspondingly, they  
189 shared identical amino acid sequence identity. The synonymous-core included 26 ORFs that

190 possessed a small amount of nucleotide diversity between genomes, but all mutations were silent,  
191 and the amino acid primary structure was therefore identical. Finally, the divergent-core contained  
192 the remaining 110 ORFs which were diverse in both nucleotide and amino acid pairwise identity.  
193 These divergent ORFs encompassed a range pairwise identity similarities from 99.97% to 91.57% at  
194 the nucleotide level and 99.98% to 91.83% for amino acid sequences (Table S1). The degree of  
195 pairwise identity difference was not correlated with an ORF's sequence length (Figure 4).

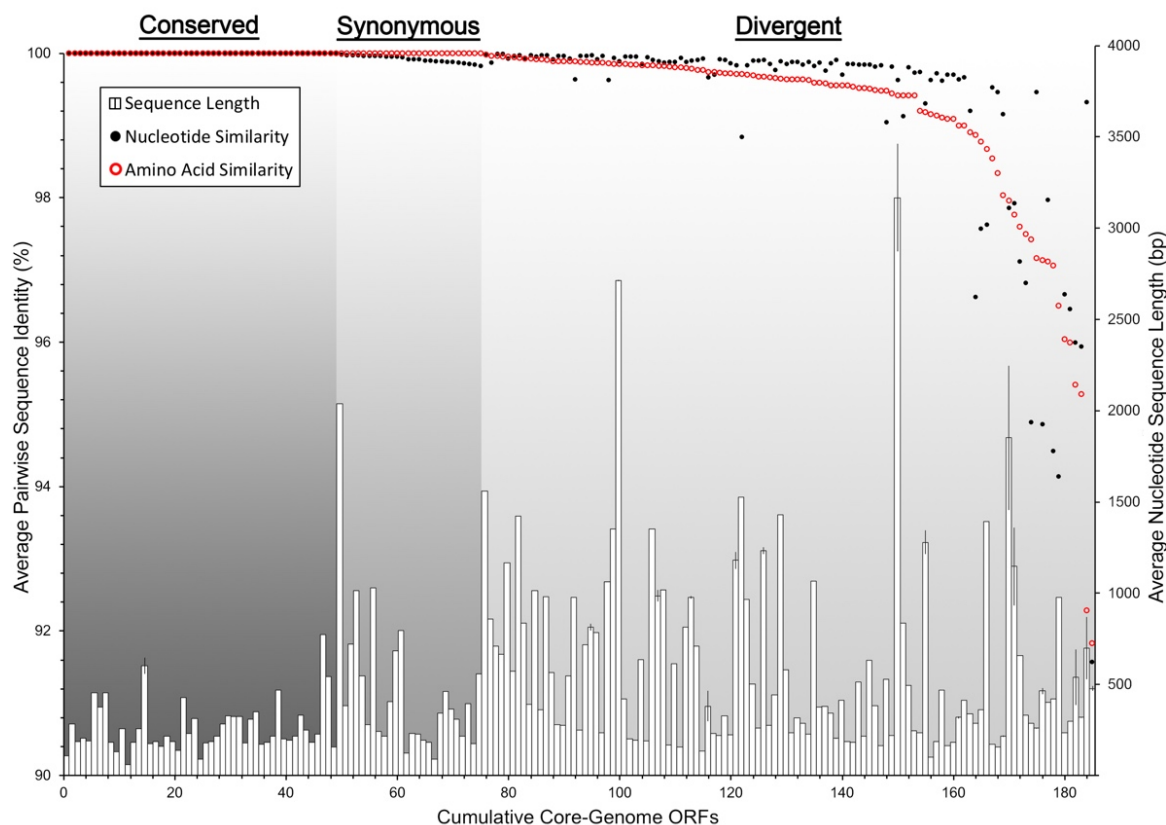

196

197 **Figure 4.** ICP1 core-genome ORF divergence. All ICP1 core-genome ORFs arranged by average  
198 pairwise similarity (171 pairwise comparisons) of both DNA nucleotide sequence alignments (black  
199 dots) and amino acid residue alignments (red circles). The histogram shows average nucleotide  
200 sequence length and standard deviation among the 19 sequences per ORF. The graph is divided  
201 into three sections by types of ORF similarity: Conserved (identical nucleotide and amino acid  
202 sequences), Synonymous (identical amino acid sequences, but silent nucleotide mutations) and  
203 Divergent (dissimilarity in both nucleotide and amino acid sequences).

204 The accessory ORFs were distributed among all 19 genomes in a complex manner (Table S2)  
205 and grouped into 15 levels of occurrence. These ranged from occurrences in 18 genomes (n=12) to  
206 singletons (n=14) (Figure 3) with several patterns of accessory ORF co-occurrence (Table S2). The  
207 most obvious example was the CRISPR-Cas locus which was previously known to reside in 8 of  
208 these genomes [13,15] and confirmed through our annotation methods. Other examples of  
209 sequential ORF co-occurrence included a locus containing ORFs 115, 116, 117, 117.1 and 118 which  
210 were found in the same five genomes, ORFs 160, 162, 163 in a different set of five overlapping  
211 genomes and ORFs 222, 223, 225 in 15 genomes.

### 212 3.3. Conserved Functional Domains

213 The majority of ORFs in both the core and accessory genomes were classified as  
214 hypothetical due to a lack of an informative BLAST identification. Only 18 of the core ORFs  
215 (9.7%) currently had a predicted function, two in the conserved-core, three in the

216 synonymous-core and 13 in the divergent-core (Table S1). The accessory core contains 11 ORFs  
217 with a putative or known function (Table S2). The NCBI conserved domain search identified 18  
218 additional core-genome ORFs and 11 accessory-genome ORFs that shared at least partial amino  
219 acid sequence homology to known functional domains.

#### 220 4. Discussion

221 ICP1 is a *V. cholerae*-infecting bacteriophage that appears to be prevalent throughout the Bay of  
222 Bengal's coastal areas and is transferred readily alongside *V. cholerae* into humans during cholera  
223 outbreaks in the region [11]. It is becoming increasingly theorized that this region is the source of  
224 most if not all global cholera outbreaks [3,4,27], and therefore a better understanding of this  
225 co-evolving predator is an important area of ongoing cholera research. In this study we have  
226 performed a comprehensive phylogenetic analysis on all available, well-sequenced ICP1 isolates to  
227 elucidate their genetic divergence over time and provide a platform on which to develop future  
228 ICP1-related bioinformatic analyses.

229 We have found that the genomes of ICP1 are surprisingly well-conserved between all isolates  
230 over the twelve-year period in which they were isolated. This is demonstrated in the whole-genome  
231 phylogeny which, while resolvable into distinct phylogenetic clusters, still only represents a  
232 maximum variation of approximately 1 nucleotide substitution per 100 base pairs between the most  
233 divergent isolates (Figure 1), many of which are likely silent or non-coding. A high degree of  
234 genomic conservation is also indicated by the relatively large core-genome shared between all  
235 isolates (Figure 3). This conservation is not only surprising due to the amount of time the  
236 core-genome has remained stable, but also due to the complex conditions that likely exist in the  
237 coastal and ocean environments where ICP1 is competing against a host population that is almost  
238 certainly more diverse than clonal outbreak strains. In at least one other study that examined  
239 multiple strains of a single marine bacteriophage, Far-T4, it was shown that sequence variability  
240 among strains was at least an order of magnitude greater than for ICP1 [28]. In contrast, a study  
241 from a less variable environment found that strains of a *Y. enterocolitica*-infecting podovirus were  
242 more highly conserved than ICP1 [29]. However, it must be considered that these environmental  
243 pressures may actually be what drives this bacteriophage to maintain a large core-genome, of  
244 which the vast majority of ORFs are hypothetical. This large gene complement may be providing  
245 the flexibility needed to compete in the Bay of Bengal. Currently we can only speculate on the exact  
246 reason for the conservation of ICP1's genome, but expanding the repertoire of well-sequenced  
247 genomes will help to put a finer constraint on the core-genome and perhaps identify genetic targets  
248 for future study.

249 Despite the stable conservation of the core-genome, ICP1 also possesses a diverse collection of  
250 accessory genes that have been integrated into several locations around the pan-genome (Figure 2).  
251 These accessory ORFs appear to be both single acquisitions as well as integrations of larger loci  
252 (Table S2). The most notable of the latter is the previously described acquisition of a CRISPR-Cas  
253 system which is used as a weapon in the arms race between ICP1 and *V. cholerae* [14,15]. This may  
254 suggest that other mechanisms of molecular warfare would be likely targets for acquisition, but if  
255 so, the conserved domain analyses failed to reveal mechanisms already known. Interestingly,  
256 though, the trend has been for genomic ORF counts to diminish over time culminating in the latest  
257 isolate from India in 2012 which possessed the fewest overall number of ORFs, i.e. the smallest  
258 accessory-genome (Figure S1). This could be due to shedding of outdated or detrimental genes,  
259 possibly because the acquisition of a CRISPR-Cas system provided enough flexibility to obviate the  
260 need for other mechanisms. And although ICP1\_2012\_A is CRISPR-Cas negative, the other five  
261 most recent isolates are positive. It is also possible that this is a regional difference though, and  
262 more sequenced genomes will help to determine if this trend is chronological or geographical or  
263 spurious.

264 Querying the ORFs against the NCBI's conserved domain database returned several hits having  
265 to do with replication, nucleotide metabolism, recombination, endonuclease activity and a few  
266 other basic functions (Table S1, S2). However, what may be most telling is that 80% of all ORFs do



267 not possess homology to any conserved domain indicating that there is a great deal left to learn  
268 about the interaction between ICP1 and *V. cholerae*. It should also be noted that the annotation of  
269 ORFs necessarily requires certain assumptions to be made about similarity cutoffs and thresholds  
270 and as such these ORF calls are best viewed as estimates. However, we were conservative in our  
271 methods and are confident that the a very large proportion of the calls are accurate.

272 As we advance our understanding of how cholera spreads globally, it will be important to also  
273 continue tracking ICP1's phylogeny and genetic composition so that we may develop a better  
274 understanding of its co-evolution with *V. cholerae* and attempt to disentangle the complex molecular  
275 and ecological interactions that may play an important role in defining cholera outbreaks.

276 **Supplementary Materials:** The following are available online at [www.mdpi.com/xxx/s1](http://www.mdpi.com/xxx/s1), Figure S1: ORF  
277 occurrence trends by year and genome length, Table S1: Core-genome ORFs pairwise similarity and CDD hits,  
278 Table S2: Accessory-genome ORFs ICP1 strain matrix.

279 **Author Contributions:** Angus Angermeyer and Kimberley Seed conceived of the study; Angus Angermeyer  
280 analyzed the data; Moon Moon Das and Durg Vijai Singh contributed sequencing data and reagents. Angus  
281 Angermeyer and Kimberley Seed wrote the paper.

282 **Funding:** This research was funded by the National Institute of Allergy and Infectious Diseases grant number  
283 R01AI127652 and the Chan Zuckerberg Biohub.

284 **Acknowledgments:** We wish to thank Zach Barth for his helpful assistance and **Genotypic Technology,**  
285 **Bangalore, India** for the sequencing of ICP1\_2012\_A.

286 **Conflicts of Interest:** The authors declare no conflict of interest. The funding sponsors had no role in the  
287 design of the study; in the collection, analyses, or interpretation of data; in the writing of the manuscript, and  
288 in the decision to publish the results.

## 289 References

- 290 1. Ali, M.; Nelson, A. R.; Lopez, A. L.; Sack, D. A. Updated global burden of cholera in endemic  
291 countries. *PLoS Negl Trop Dis* **2015**, *9*, e0003832.
- 292 2. Safa, A.; Nair, G. B.; Kong, R. Y. C. Evolution of new variants of *Vibrio cholerae* O1. *Trends*  
293 *Microbiol.* **2010**, *18*, 46–54.
- 294 3. Mutreja, A.; Kim, D. W.; Thomson, N. R.; Connor, T. R.; Lee, J. H.; Kariuki, S.; Croucher, N. J.;  
295 Choi, S. Y.; Harris, S. R.; Lebens, M.; Niyogi, S. K.; Kim, E. J.; Ramamurthy, T.; Chun, J.; Wood, J.  
296 L. N.; Clemens, J. D.; Czerkinsky, C.; Nair, G. B.; Holmgren, J.; Parkhill, J.; Dougan, G. Evidence  
297 for several waves of global transmission in the seventh cholera pandemic. *Nature* **2011**, *477*,  
298 462–465.
- 299 4. Moore, S.; Thomson, N.; Mutreja, A.; Piarroux, R. Widespread epidemic cholera caused by a  
300 restricted subset of *Vibrio cholerae* clones. *Clin. Microbiol. Infect.* **2014**, *20*, 373–379.
- 301 5. Weill, F.-X.; Domman, D.; Njamkepo, E.; Tarr, C.; Rauzier, J.; Fawal, N.; Keddy, K. H.; Salje, H.;  
302 Moore, S.; Mukhopadhyay, A. K.; Bercion, R.; Luquero, F. J.; Ngandjio, A.; Dosso, M.;  
303 Monakhova, E.; Garin, B.; Bouchier, C.; Pazzani, C.; Mutreja, A.; Grunow, R.; Sidikou, F.; Bonte,  
304 L.; Breurec, S.; Damian, M.; Njanpop-Lafourcade, B.-M.; Sapriel, G.; Page, A.-L.; Hamze, M.;  
305 Henkens, M.; Chowdhury, G.; Mengel, M.; Koeck, J.-L.; Fournier, J.-M.; Dougan, G.; Grimont, P.  
306 A. D.; Parkhill, J.; Holt, K. E.; Piarroux, R.; Ramamurthy, T.; Quilici, M.-L.; Thomson, N. R.  
307 Genomic history of the seventh pandemic of cholera in Africa. *Science* **2017**, *358*, 785–789.
- 308 6. Cho, Y.-J.; Yi, H.; Lee, J. H.; Kim, D. W.; Chun, J. Genomic evolution of *Vibrio cholerae*. *Curr Opin*  
309 *Microbiol* **2010**, *13*, 646–651.
- 310 7. Domman, D.; Quilici, M.-L.; Dorman, M. J.; Njamkepo, E.; Mutreja, A.; Mather, A. E.; Delgado, G.;  
311 Morales-Espinosa, R.; Grimont, P. A. D.; Lizárraga-Partida, M. L.; Bouchier, C.; Aanensen, D. M.;

- 312 Kuri-Morales, P.; Tarr, C. L.; Dougan, G.; Parkhill, J.; Campos, J.; Cravioto, A.; Weill, F.-X.;  
313 Thomson, N. R. Integrated view of *Vibrio cholerae* in the Americas. *Science* **2017**, *358*, 789–793.
- 314 8. Parikka, K. J.; Le Romancer, M.; Wauters, N.; Jacquet, S. Deciphering the virus-to-prokaryote ratio  
315 (VPR): insights into virus-host relationships in a variety of ecosystems. *Biol Rev Camb Philos Soc*  
316 **2017**, *92*, 1081–1100.
- 317 9. Ofir, G.; Sorek, R. Contemporary Phage Biology: From Classic Models to New Insights. *Cell* **2018**,  
318 *172*, 1260–1270.
- 319 10. Seed, K. D.; Faruque, S. M.; Mekalanos, J. J.; Calderwood, S. B.; Qadri, F.; Camilli, A. Phase  
320 Variable O Antigen Biosynthetic Genes Control Expression of the Major Protective Antigen and  
321 Bacteriophage Receptor in *Vibrio cholerae* O1. *PLoS Pathog* **2012**, *8*, e1002917–13.
- 322 11. Seed, K. D.; Bodi, K. L.; Kropinski, A. M.; Ackermann, H.-W.; Calderwood, S. B.; Qadri, F.;  
323 Camilli, A. Evidence of a dominant lineage of *Vibrio cholerae*-specific lytic bacteriophages shed  
324 by cholera patients over a 10-year period in Dhaka, Bangladesh. *MBio* **2011**, *2*, e00334–10.
- 325 12. Faruque, S. M.; Naser, I. B.; Islam, M. J.; Faruque, A. S. G.; Ghosh, A. N.; Nair, G. B.; Sack, D. A.;  
326 Mekalanos, J. J. Seasonal epidemics of cholera inversely correlate with the prevalence of  
327 environmental cholera phages. *Proc Natl Acad Sci USA* **2005**, *102*, 1702–1707.
- 328 13. Naser, I. B.; Hoque, M. M.; Nahid, M. A.; Tareq, T. M.; Rocky, M. K.; Faruque, S. M. Analysis of  
329 the CRISPR-Cas system in bacteriophages active on epidemic strains of *Vibrio cholerae* in  
330 Bangladesh. *Scientific Reports* **2017**, *7*, 14880.
- 331 14. O'Hara, B. J.; Barth, Z. K.; McKitterick, A. C.; Seed, K. D. A highly specific phage defense system  
332 is a conserved feature of the *Vibrio cholerae* mobilome. *PLoS Genet.* **2017**, *13*, e1006838.
- 333 15. Seed, K. D.; Lazinski, D. W.; Calderwood, S. B.; Camilli, A. A bacteriophage encodes its own  
334 CRISPR/Cas adaptive response to evade host innate immunity. *Nature* **2013**, *494*, 489–491.
- 335 16. Peng, Y.; Leung, H. C. M.; Yiu, S. M.; Chin, F. Y. L. IDBA-UD: a de novo assembler for single-cell  
336 and metagenomic sequencing data with highly uneven depth. *Bioinformatics* **2012**, *28*, 1420–1428.
- 337 17. Edgar, R. C. Search and clustering orders of magnitude faster than BLAST. *Bioinformatics* **2010**,  
338 *26*, 2460–2461.
- 339 18. David, L. A.; Weil, A.; Ryan, E. T.; Calderwood, S. B.; Harris, J. B.; Chowdhury, F.; Begum, Y.;  
340 Qadri, F.; LaRocque, R. C.; Turnbaugh, P. J. Gut microbial succession follows acute secretory  
341 diarrhea in humans. *MBio* **2015**, *6*, e00381–15.
- 342 19. Das, M. M.; Bhotra, T.; Zala, D.; Singh, D. V. Phenotypic and genetic characteristics of *Vibrio*  
343 *cholerae* O1 carrying Haitian ctxB and attributes of classical and El Tor biotypes isolated from  
344 Silvassa, India. *Journal of Medical Microbiology* **2016**, *65*, 720–728.
- 345 20. Darling, A. E.; Mau, B.; Perna, N. T. progressiveMauve: multiple genome alignment with gene  
346 gain, loss and rearrangement. *PLoS ONE* **2010**, *5*, e11147.
- 347 21. Cock, P. J. A.; Antao, T.; Chang, J. T.; Chapman, B. A.; Cox, C. J.; Dalke, A.; Friedberg, I.;  
348 Hamelryck, T.; Kauff, F.; Wilczynski, B.; de Hoon, M. J. L. Biopython: freely available Python  
349 tools for computational molecular biology and bioinformatics. *Bioinformatics* **2009**, *25*, 1422–1423.
- 350 22. Guindon, S.; Dufayard, J.-F.; Lefort, V.; Anisimova, M.; Hordijk, W.; Gascuel, O. New algorithms  
351 and methods to estimate maximum-likelihood phylogenies: assessing the performance of PhyML  
352 3.0. *Syst. Biol.* **2010**, *59*, 307–321.
- 353 23. Huson, D. H.; Scornavacca, C. Dendroscope 3: an interactive tool for rooted phylogenetic trees  
354 and networks. *Syst. Biol.* **2012**, *61*, 1061–1067.

- 355 24. Alikhan, N.-F.; Petty, N. K.; Ben Zakour, N. L.; Beatson, S. A. BLAST Ring Image Generator  
356 (BRIG): simple prokaryote genome comparisons. *BMC Genomics* **2011**, *12*, 402.
- 357 25. Camacho, C.; Coulouris, G.; Avagyan, V.; Ma, N.; Papadopoulos, J.; Bealer, K.; Madden, T. L.  
358 BLAST+: architecture and applications. *BMC Bioinformatics* **2009**, *10*, 421.
- 359 26. Hyatt, D.; Chen, G.-L.; LoCascio, P. F.; Land, M. L.; Larimer, F. W.; Hauser, L. J. Prodigal:  
360 prokaryotic gene recognition and translation initiation site identification. *BMC Bioinformatics* **2010**,  
361 *11*, 119.
- 362 27. Hu, D.; Liu, B.; Feng, L.; Ding, P.; Guo, X.; Wang, M.; Cao, B.; Reeves, P. R.; Wang, L. Origins of  
363 the current seventh cholera pandemic. *Proc Natl Acad Sci USA* **2016**, *113*, E7730–E7739.
- 364 28. Roux, S.; Enault, F.; Ravet, V.; Pereira, O.; Sullivan, M. B. Genomic characteristics and  
365 environmental distributions of the uncultivated Far-T4 phages. *Front Microbiol* **2015**, *6*, 199.
- 366 29. Salem, M.; Skurnik, M. Genomic Characterization of Sixteen *Yersinia enterocolitica*-Infecting  
367 Podoviruses of Pig Origin. *Viruses* **2018**, *10*.
- 368
- 369

### Number of ORFs in Genome vs. Isolation Year

**A**

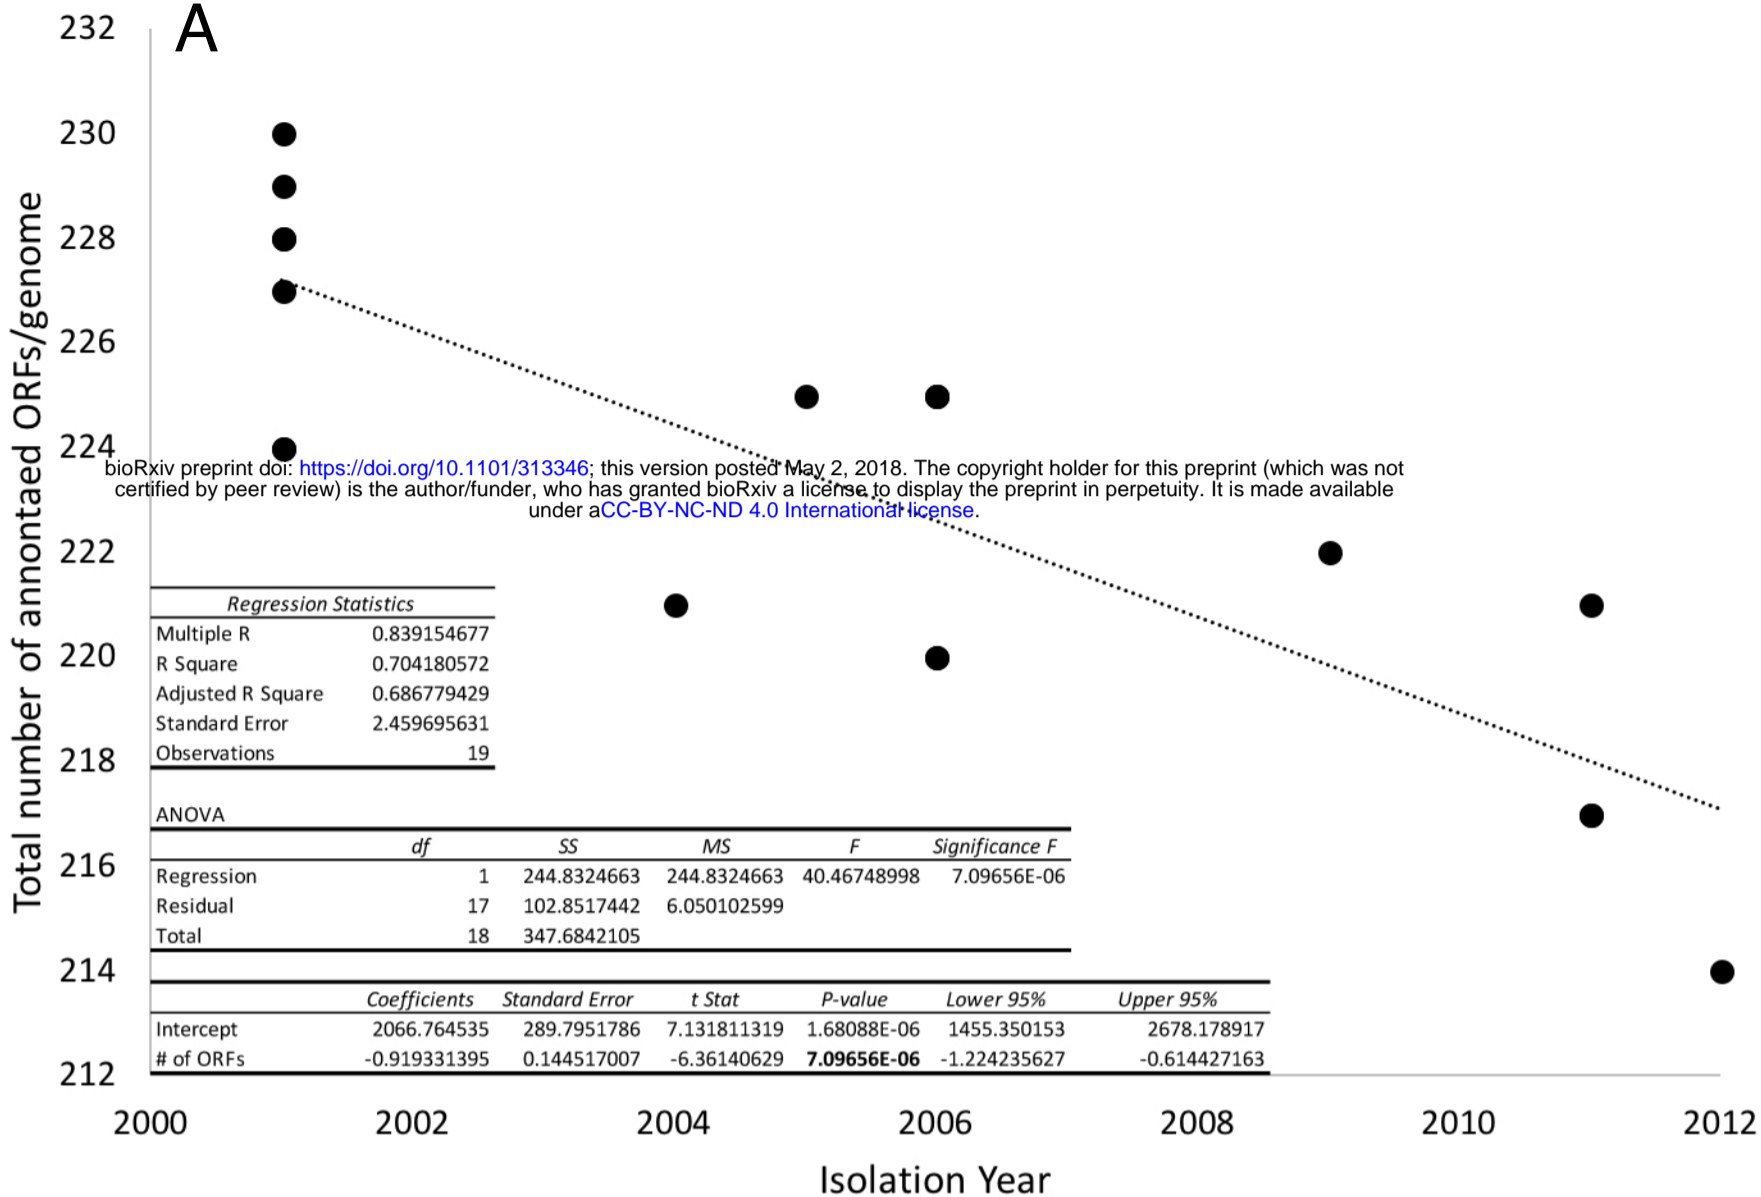

### Number of ORFs in Genome vs. Genome Length

**B**

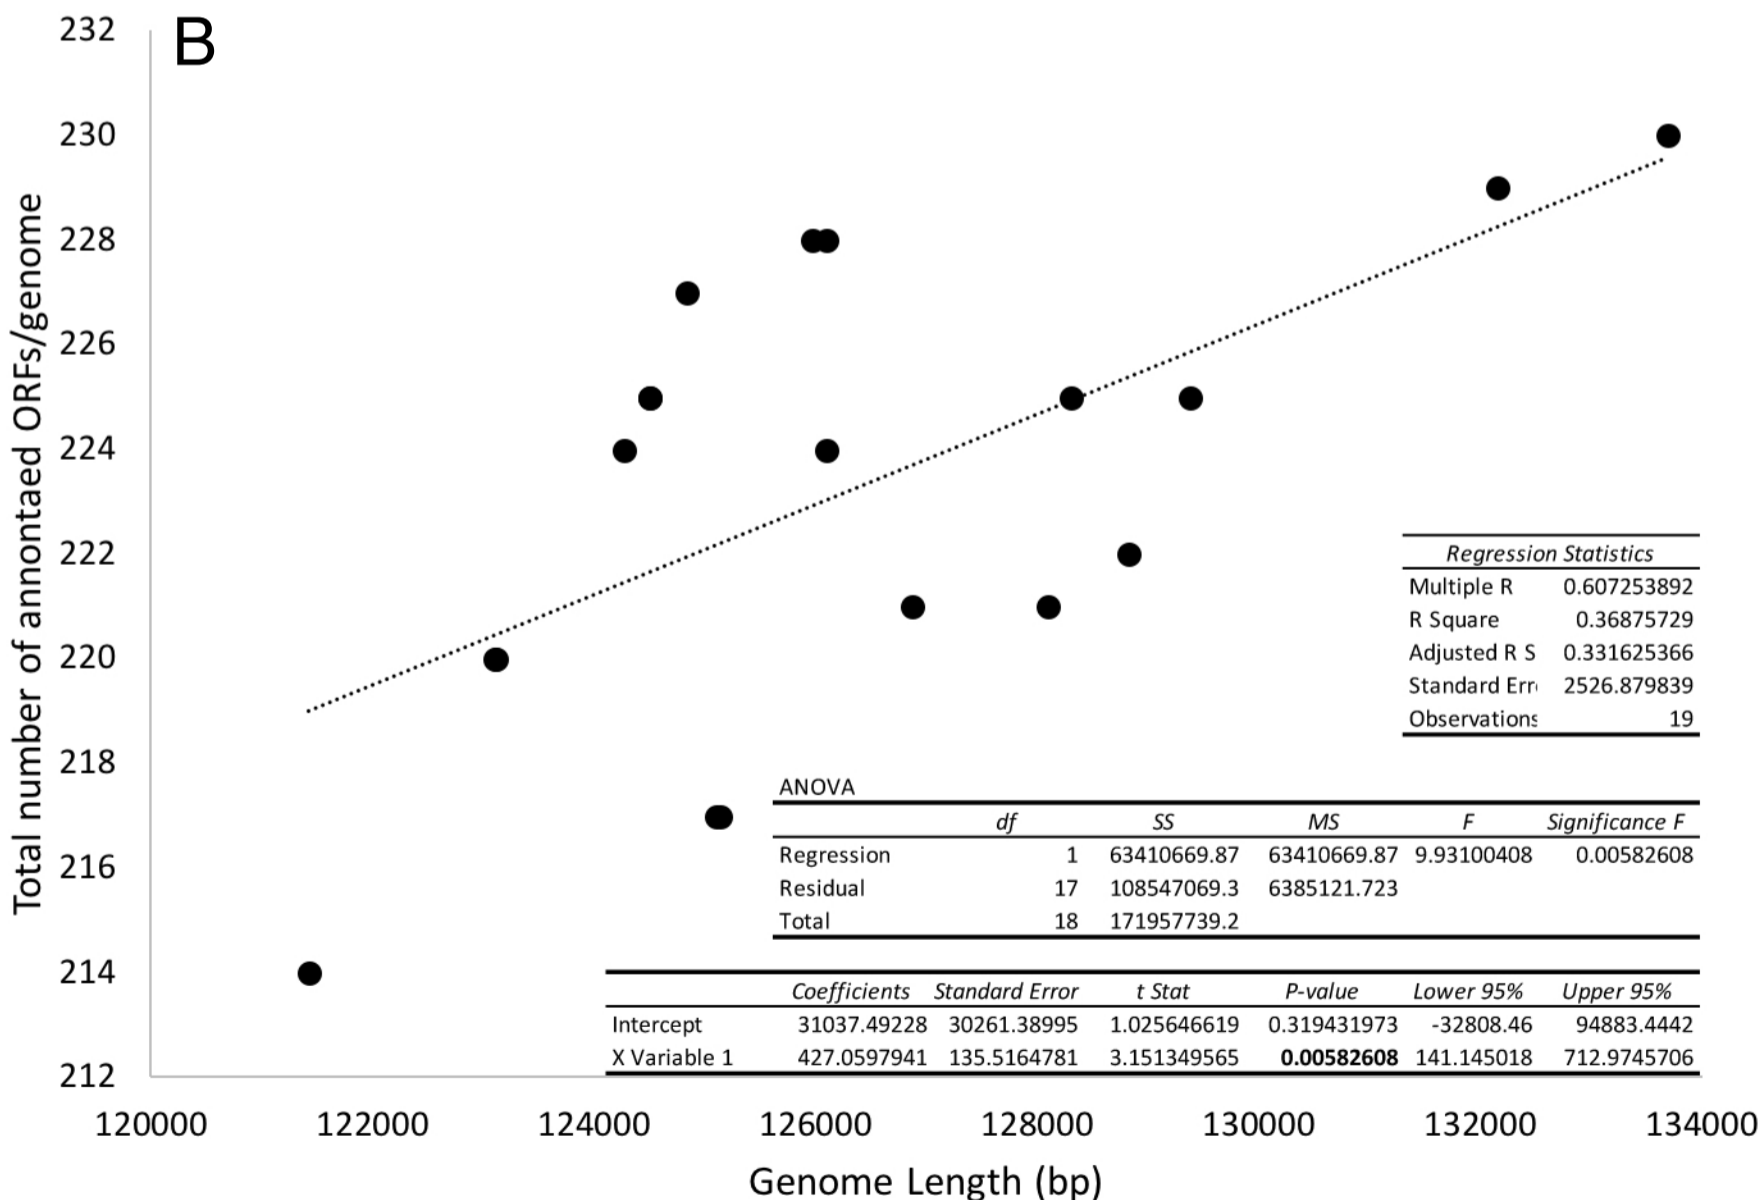

Figure S1: ORF linear regression statistics. ANOVA analyses of the linear regressions between (A) number of ORFs/genome vs genome isolation year and (B) ORFs/genome vs. genome length.

Table S1: Core-genome Information

|                 | ORF Name | Nucleotide Similarity | Amino Acid Similarity | nucl_stddev | aa_stddev | Known Function                                       | CDD Domain name               | E-Value  | PSSM-ID |
|-----------------|----------|-----------------------|-----------------------|-------------|-----------|------------------------------------------------------|-------------------------------|----------|---------|
| Conserved Core  | ORF1     | 100.00                | 100.00                | 0.00        | 0.00      | -                                                    | -                             | -        | -       |
|                 | ORF10    | 100.00                | 100.00                | 0.00        | 0.00      | -                                                    | -                             | -        | -       |
|                 | ORF109   | 100.00                | 100.00                | 0.00        | 0.00      | -                                                    | -                             | -        | -       |
|                 | ORF12    | 100.00                | 100.00                | 0.00        | 0.00      | -                                                    | -                             | -        | -       |
|                 | ORF13    | 100.00                | 100.00                | 0.00        | 0.00      | -                                                    | -                             | -        | -       |
|                 | ORF134   | 100.00                | 100.00                | 0.00        | 0.00      | -                                                    | -                             | -        | -       |
|                 | ORF135   | 100.00                | 100.00                | 0.00        | 0.00      | -                                                    | -                             | -        | -       |
|                 | ORF138   | 100.00                | 100.00                | 0.00        | 0.00      | -                                                    | -                             | -        | -       |
|                 | ORF142   | 100.00                | 100.00                | 0.00        | 0.00      | -                                                    | -                             | -        | -       |
|                 | ORF154   | 100.00                | 100.00                | 0.00        | 0.00      | -                                                    | -                             | -        | -       |
|                 | ORF158   | 100.00                | 100.00                | 0.00        | 0.00      | -                                                    | -                             | -        | -       |
|                 | ORF164   | 100.00                | 100.00                | 0.00        | 0.00      | -                                                    | -                             | -        | -       |
|                 | ORF167   | 100.00                | 100.00                | 0.00        | 0.00      | -                                                    | -                             | -        | -       |
|                 | ORF168   | 100.00                | 100.00                | 0.00        | 0.00      | -                                                    | -                             | -        | -       |
|                 | ORF171   | 100.00                | 100.00                | 0.00        | 0.00      | -                                                    | -                             | -        | -       |
|                 | ORF175   | 100.00                | 100.00                | 0.00        | 0.00      | -                                                    | HAD_like superfamily          | 1.87E-04 | 328728  |
|                 | ORF180   | 100.00                | 100.00                | 0.00        | 0.00      | -                                                    | -                             | -        | -       |
|                 | ORF195   | 100.00                | 100.00                | 0.00        | 0.00      | -                                                    | -                             | -        | -       |
|                 | ORF206   | 100.00                | 100.00                | 0.00        | 0.00      | -                                                    | -                             | -        | -       |
|                 | ORF214   | 100.00                | 100.00                | 0.00        | 0.00      | -                                                    | -                             | -        | -       |
|                 | ORF216   | 100.00                | 100.00                | 0.00        | 0.00      | -                                                    | -                             | -        | -       |
|                 | ORF218   | 100.00                | 100.00                | 0.00        | 0.00      | -                                                    | -                             | -        | -       |
|                 | ORF226   | 100.00                | 100.00                | 0.00        | 0.00      | -                                                    | -                             | -        | -       |
|                 | ORF227   | 100.00                | 100.00                | 0.00        | 0.00      | -                                                    | -                             | -        | -       |
|                 | ORF26    | 100.00                | 100.00                | 0.00        | 0.00      | -                                                    | -                             | -        | -       |
|                 | ORF29    | 100.00                | 100.00                | 0.00        | 0.00      | -                                                    | -                             | -        | -       |
|                 | ORF3     | 100.00                | 100.00                | 0.00        | 0.00      | -                                                    | -                             | -        | -       |
|                 | ORF32    | 100.00                | 100.00                | 0.00        | 0.00      | -                                                    | -                             | -        | -       |
|                 | ORF33    | 100.00                | 100.00                | 0.00        | 0.00      | -                                                    | -                             | -        | -       |
|                 | ORF34    | 100.00                | 100.00                | 0.00        | 0.00      | -                                                    | -                             | -        | -       |
|                 | ORF39    | 100.00                | 100.00                | 0.00        | 0.00      | -                                                    | -                             | -        | -       |
|                 | ORF41    | 100.00                | 100.00                | 0.00        | 0.00      | -                                                    | DUF3696 superfamily           | 6.88E-03 | 331172  |
|                 | ORF42    | 100.00                | 100.00                | 0.00        | 0.00      | -                                                    | -                             | -        | -       |
|                 | ORF47    | 100.00                | 100.00                | 0.00        | 0.00      | -                                                    | -                             | -        | -       |
|                 | ORF48    | 100.00                | 100.00                | 0.00        | 0.00      | -                                                    | -                             | -        | -       |
|                 | ORF50    | 100.00                | 100.00                | 0.00        | 0.00      | -                                                    | -                             | -        | -       |
|                 | ORF52    | 100.00                | 100.00                | 0.00        | 0.00      | -                                                    | DUF1778 superfamily           | 5.16E-06 | 321696  |
|                 | ORF54    | 100.00                | 100.00                | 0.00        | 0.00      | -                                                    | -                             | -        | -       |
|                 | ORF55    | 100.00                | 100.00                | 0.00        | 0.00      | ribonuclease H                                       | RNase_Hi prokaryote_like      | 1.19E-56 | 260010  |
|                 | ORF56    | 100.00                | 100.00                | 0.00        | 0.00      | -                                                    | RNase_H_like superfamily      | 2.12E-14 | 326352  |
|                 | ORF60    | 100.00                | 100.00                | 0.00        | 0.00      | -                                                    | -                             | -        | -       |
|                 | ORF61    | 100.00                | 100.00                | 0.00        | 0.00      | -                                                    | -                             | -        | -       |
|                 | ORF62    | 100.00                | 100.00                | 0.00        | 0.00      | -                                                    | -                             | -        | -       |
|                 | ORF64    | 100.00                | 100.00                | 0.00        | 0.00      | -                                                    | -                             | -        | -       |
|                 | ORF65    | 100.00                | 100.00                | 0.00        | 0.00      | -                                                    | -                             | -        | -       |
|                 | ORF66    | 100.00                | 100.00                | 0.00        | 0.00      | -                                                    | Peptidases_S8_S53 superfamily | 5.78E-03 | 324584  |
|                 | ORF75    | 100.00                | 100.00                | 0.00        | 0.00      | putative baseplate assembly protein                  | Phage_base_V superfamily      | 9.89E-03 | 327437  |
|                 | ORF82    | 100.00                | 100.00                | 0.00        | 0.00      | -                                                    | -                             | -        | -       |
| ORF9            | 100.00   | 100.00                | 0.00                  | 0.00        | -         | -                                                    | -                             | -        |         |
| Synonymous Core | ORF57    | 99.98                 | 100.00                | 0.02        | 0.00      | putative primase/helicase                            | RecA-like_NTPases superfamily | 7.80E-28 | 333705  |
|                 | ORF166   | 99.97                 | 100.00                | 0.08        | 0.00      | -                                                    | -                             | -        | -       |
|                 | ORF80    | 99.97                 | 100.00                | 0.06        | 0.00      | HNH homing endonuclease                              | HNHc superfamily              | 7.94E-05 | 320750  |
|                 | ORF189   | 99.97                 | 100.00                | 0.05        | 0.00      | -                                                    | DnaQ_like_exo superfamily     | 1.39E-05 | 324557  |
|                 | ORF137   | 99.96                 | 100.00                | 0.07        | 0.00      | -                                                    | -                             | -        | -       |
|                 | ORF213   | 99.96                 | 100.00                | 0.11        | 0.00      | -                                                    | -                             | -        | -       |
|                 | ORF81    | 99.96                 | 100.00                | 0.05        | 0.00      | -                                                    | Macolilin superfamily         | 3.48E-04 | 313022  |
|                 | ORF43    | 99.96                 | 100.00                | 0.13        | 0.00      | -                                                    | -                             | -        | -       |
|                 | ORF45    | 99.95                 | 100.00                | 0.14        | 0.00      | -                                                    | -                             | -        | -       |
|                 | ORF74    | 99.95                 | 100.00                | 0.10        | 0.00      | -                                                    | -                             | -        | -       |
|                 | ORF4     | 99.95                 | 100.00                | 0.07        | 0.00      | -                                                    | -                             | -        | -       |
|                 | ORF112   | 99.94                 | 100.00                | 0.06        | 0.00      | putative DNA-binding protein Roi                     | Phage_pRha superfamily        | 2.26E-08 | 324635  |
|                 | ORF191   | 99.91                 | 100.00                | 0.25        | 0.00      | -                                                    | -                             | -        | -       |
|                 | ORF46    | 99.91                 | 100.00                | 0.17        | 0.00      | -                                                    | -                             | -        | -       |
|                 | ORF30    | 99.91                 | 100.00                | 0.18        | 0.00      | -                                                    | -                             | -        | -       |
|                 | ORF44    | 99.90                 | 100.00                | 0.20        | 0.00      | -                                                    | -                             | -        | -       |
|                 | ORF210   | 99.89                 | 100.00                | 0.22        | 0.00      | -                                                    | -                             | -        | -       |
|                 | ORF153   | 99.88                 | 100.00                | 0.34        | 0.00      | -                                                    | -                             | -        | -       |
|                 | ORF139   | 99.88                 | 100.00                | 0.14        | 0.00      | -                                                    | -                             | -        | -       |
|                 | ORF83    | 99.88                 | 100.00                | 0.12        | 0.00      | -                                                    | -                             | -        | -       |
|                 | ORF7     | 99.88                 | 100.00                | 0.14        | 0.00      | -                                                    | -                             | -        | -       |
|                 | ORF194   | 99.87                 | 100.00                | 0.16        | 0.00      | -                                                    | -                             | -        | -       |
|                 | ORF2     | 99.86                 | 100.00                | 0.22        | 0.00      | -                                                    | -                             | -        | -       |
|                 | ORF181   | 99.85                 | 100.00                | 0.22        | 0.00      | -                                                    | -                             | -        | -       |
|                 | ORF15    | 99.84                 | 100.00                | 0.25        | 0.00      | -                                                    | -                             | -        | -       |
|                 | ORF126   | 99.82                 | 100.00                | 0.36        | 0.00      | -                                                    | -                             | -        | -       |
|                 | ORF176   | 99.97                 | 99.98                 | 0.03        | 0.06      | putative exodeoxyribonuclease                        | -                             | -        | -       |
|                 | ORF173   | 99.87                 | 99.96                 | 0.09        | 0.11      | recombination-associated protein RdgC                | RdgC superfamily              | 5.57E-21 | 321354  |
|                 | ORF170   | 99.99                 | 99.96                 | 0.04        | 0.13      | -                                                    | -                             | -        | -       |
|                 | ORF179   | 99.98                 | 99.95                 | 0.05        | 0.14      | -                                                    | -                             | -        | -       |
|                 | ORF68    | 99.92                 | 99.95                 | 0.11        | 0.11      | -                                                    | -                             | -        | -       |
|                 | ORF49    | 99.96                 | 99.94                 | 0.07        | 0.16      | -                                                    | -                             | -        | -       |
|                 | ORF73    | 99.96                 | 99.94                 | 0.04        | 0.10      | putative baseplate component                         | Baseplate_J superfamily       | 1.29E-05 | 321435  |
|                 | ORF196   | 99.91                 | 99.92                 | 0.12        | 0.22      | putative adenine methyltransferase                   | Dam                           | 2.70E-32 | 223415  |
|                 | ORF131   | 99.97                 | 99.92                 | 0.08        | 0.24      | -                                                    | -                             | -        | -       |
|                 | ORF76    | 99.95                 | 99.92                 | 0.07        | 0.13      | -                                                    | -                             | -        | -       |
|                 | ORF71    | 99.97                 | 99.91                 | 0.08        | 0.26      | -                                                    | -                             | -        | -       |
|                 | ORF211   | 99.97                 | 99.91                 | 0.05        | 0.15      | ClpP ATP-dependent protease subunit                  | crotonase-like superfamily    | 6.26E-19 | 329030  |
|                 | ORF120   | 99.91                 | 99.89                 | 0.10        | 0.22      | -                                                    | -                             | -        | -       |
|                 | ORF63    | 99.96                 | 99.89                 | 0.11        | 0.33      | -                                                    | -                             | -        | -       |
|                 | ORF132   | 99.96                 | 99.88                 | 0.11        | 0.34      | -                                                    | -                             | -        | -       |
|                 | ORF177   | 99.92                 | 99.88                 | 0.13        | 0.23      | -                                                    | -                             | -        | -       |
|                 | ORF79    | 99.63                 | 99.88                 | 0.55        | 0.16      | -                                                    | -                             | -        | -       |
|                 | ORF140   | 99.96                 | 99.87                 | 0.12        | 0.37      | -                                                    | DUF2130 superfamily           | 5.56E-03 | 331406  |
|                 | ORF207   | 99.96                 | 99.87                 | 0.07        | 0.20      | putative Gp5 baseplate hub subunit and tail lysozyme | NLPC_P60 superfamily          | 3.15E-35 | 328779  |
|                 | ORF59    | 99.97                 | 99.87                 | 0.08        | 0.38      | -                                                    | -                             | -        | -       |
|                 | ORF72    | 99.91                 | 99.87                 | 0.08        | 0.18      | -                                                    | -                             | -        | -       |

Divergent Core

|          |       |       |      |       |                                                  |                             |           |        |
|----------|-------|-------|------|-------|--------------------------------------------------|-----------------------------|-----------|--------|
| ORF188   | 99.96 | 99.86 | 0.13 | 0.40  | -                                                | -                           | -         | -      |
| ORF124   | 99.63 | 99.86 | 0.46 | 0.16  | -                                                | -                           | -         | -      |
| ORF204   | 99.93 | 99.85 | 0.06 | 0.14  | ribonucleoside diphosphate reductase, beta chain | Ferritin_like superfamily   | 1.00E-52  | 320867 |
| ORF58    | 99.89 | 99.85 | 0.09 | 0.12  | DNA polymerase                                   | DNA_pol_A superfamily       | 5.25E-33  | 322025 |
| ORF169   | 99.95 | 99.85 | 0.10 | 0.30  | -                                                | -                           | -         | -      |
| ORF202   | 99.95 | 99.84 | 0.15 | 0.46  | -                                                | -                           | -         | -      |
| ORF144   | 99.95 | 99.84 | 0.16 | 0.48  | -                                                | -                           | -         | -      |
| ORF36    | 99.85 | 99.83 | 0.14 | 0.23  | -                                                | -                           | -         | -      |
| ORF11    | 99.95 | 99.83 | 0.16 | 0.49  | -                                                | -                           | -         | -      |
| ORF215   | 99.90 | 99.83 | 0.08 | 0.14  | DNA ligase                                       | CDC9 superfamily            | 1.57E-99  | 330238 |
| ORF28    | 99.88 | 99.82 | 0.23 | 0.37  | -                                                | HNHc                        | 1.08E-05  | 238038 |
| ORF122   | 99.86 | 99.82 | 0.12 | 0.22  | putative major head protein                      | Phage_cap_E superfamily     | 6.03E-24  | 309113 |
| ORF155   | 99.87 | 99.81 | 0.37 | 0.56  | -                                                | -                           | -         | -      |
| ORF78    | 99.88 | 99.81 | 0.13 | 0.26  | -                                                | -                           | -         | -      |
| ORF151   | 99.93 | 99.80 | 0.19 | 0.59  | -                                                | -                           | -         | -      |
| ORF208   | 99.88 | 99.80 | 0.12 | 0.22  | PhoH family protein                              | P-loop_NTPase superfamily   | 4.93E-31  | 328724 |
| ORF53    | 99.89 | 99.78 | 0.16 | 0.31  | -                                                | -                           | -         | -      |
| ORF172   | 99.91 | 99.77 | 0.14 | 0.33  | -                                                | -                           | -         | -      |
| ORF25    | 99.92 | 99.76 | 0.23 | 0.70  | -                                                | -                           | -         | -      |
| ORF192   | 99.66 | 99.74 | 0.45 | 0.49  | -                                                | -                           | -         | -      |
| ORF145   | 99.70 | 99.74 | 0.46 | 0.53  | -                                                | -                           | -         | -      |
| ORF27    | 99.91 | 99.73 | 0.18 | 0.55  | -                                                | -                           | -         | -      |
| ORF8     | 99.91 | 99.72 | 0.15 | 0.44  | -                                                | -                           | -         | -      |
| ORF6     | 99.86 | 99.72 | 0.31 | 0.83  | -                                                | -                           | -         | -      |
| ORF130   | 99.83 | 99.71 | 0.12 | 0.26  | -                                                | -                           | -         | -      |
| ORF127   | 98.84 | 99.71 | 2.24 | 0.47  | -                                                | -                           | -         | -      |
| ORF193   | 99.83 | 99.70 | 0.13 | 0.25  | putative thymidylate synthase                    | Thy1 superfamily            | 1.56E-04  | 332234 |
| ORF152   | 99.90 | 99.69 | 0.10 | 0.30  | -                                                | -                           | -         | -      |
| ORF220   | 99.89 | 99.67 | 0.17 | 0.52  | -                                                | -                           | -         | -      |
| ORF121   | 99.90 | 99.67 | 0.07 | 0.21  | -                                                | TSorf172                    | 8.07E-05  | 313714 |
| ORF143   | 99.85 | 99.67 | 0.26 | 0.53  | -                                                | -                           | -         | -      |
| ORF133   | 99.77 | 99.66 | 0.18 | 0.40  | -                                                | -                           | -         | -      |
| ORF128   | 99.88 | 99.65 | 0.11 | 0.34  | terminase large subunit                          | Terminase_6 superfamily     | 7.55E-28  | 321850 |
| ORF40    | 99.85 | 99.64 | 0.14 | 0.34  | -                                                | -                           | -         | -      |
| ORF217   | 99.88 | 99.64 | 0.19 | 0.58  | -                                                | -                           | -         | -      |
| ORF184   | 99.88 | 99.63 | 0.16 | 0.50  | -                                                | -                           | -         | -      |
| ORF187   | 99.84 | 99.63 | 0.23 | 0.50  | -                                                | -                           | -         | -      |
| ORF150   | 99.88 | 99.63 | 0.20 | 0.60  | -                                                | -                           | -         | -      |
| ORF70    | 99.82 | 99.59 | 0.09 | 0.30  | -                                                | -                           | -         | -      |
| ORF31    | 99.86 | 99.59 | 0.17 | 0.51  | -                                                | -                           | -         | -      |
| ORF185   | 99.75 | 99.58 | 0.21 | 0.40  | -                                                | -                           | -         | -      |
| ORF51    | 99.85 | 99.55 | 0.17 | 0.52  | -                                                | -                           | -         | -      |
| ORF212   | 99.90 | 99.55 | 0.19 | 0.72  | -                                                | -                           | -         | -      |
| ORF77    | 99.70 | 99.55 | 0.63 | 0.64  | -                                                | -                           | -         | -      |
| ORF156   | 99.85 | 99.55 | 0.24 | 0.72  | -                                                | -                           | -         | -      |
| ORF136   | 99.85 | 99.53 | 0.25 | 0.75  | -                                                | -                           | -         | -      |
| ORF200   | 99.84 | 99.52 | 0.19 | 0.58  | -                                                | -                           | -         | -      |
| ORF186   | 99.84 | 99.51 | 0.22 | 0.66  | -                                                | -                           | -         | -      |
| ORF209   | 99.84 | 99.50 | 0.14 | 0.43  | -                                                | -                           | -         | -      |
| ORF123   | 99.81 | 99.48 | 0.24 | 0.57  | -                                                | -                           | -         | -      |
| ORF108   | 99.83 | 99.48 | 0.27 | 0.83  | -                                                | -                           | -         | -      |
| ORF107   | 99.04 | 99.48 | 1.41 | 0.64  | -                                                | -                           | -         | -      |
| ORF199   | 99.82 | 99.44 | 0.22 | 0.67  | -                                                | -                           | -         | -      |
| ORF203   | 99.63 | 99.42 | 0.83 | 1.27  | -                                                | Ribonuc_red_1gC superfamily | 3.16E-87  | 332162 |
| ORF125   | 99.13 | 99.42 | 0.94 | 0.46  | -                                                | Peptidase_578_2 superfamily | 4.65E-10  | 317012 |
| ORF205   | 99.81 | 99.42 | 0.19 | 0.56  | -                                                | -                           | -         | -      |
| ORF219   | 99.72 | 99.41 | 0.26 | 0.70  | -                                                | -                           | -         | -      |
| ORF37    | 99.74 | 99.19 | 0.26 | 0.78  | -                                                | -                           | -         | -      |
| ORF165   | 99.30 | 99.18 | 1.32 | 1.43  | -                                                | -                           | -         | -      |
| ORF129   | 99.62 | 99.15 | 0.51 | 1.36  | -                                                | -                           | -         | -      |
| ORF141   | 99.72 | 99.14 | 0.27 | 0.82  | -                                                | -                           | -         | -      |
| ORF198   | 99.62 | 99.10 | 0.29 | 0.63  | -                                                | -                           | -         | -      |
| ORF201   | 99.70 | 99.09 | 0.30 | 0.93  | -                                                | -                           | -         | -      |
| ORF67    | 99.70 | 99.08 | 0.32 | 0.97  | -                                                | -                           | -         | -      |
| ORF110   | 99.63 | 99.00 | 0.63 | 1.60  | -                                                | -                           | -         | -      |
| ORF69    | 99.67 | 98.99 | 0.22 | 0.68  | -                                                | -                           | -         | -      |
| ORF94    | 99.20 | 98.90 | 1.98 | 2.19  | -                                                | -                           | -         | -      |
| ORF103   | 96.62 | 98.87 | 3.49 | 0.87  | -                                                | -                           | -         | -      |
| ORF93    | 97.56 | 98.77 | 3.12 | 1.64  | -                                                | -                           | -         | -      |
| ORF84    | 97.62 | 98.67 | 3.12 | 1.99  | -                                                | DUF3383 superfamily         | 4.95E-09  | 314693 |
| ORF189.1 | 99.52 | 98.54 | 0.58 | 1.76  | -                                                | -                           | -         | -      |
| ORF197   | 99.46 | 98.34 | 0.42 | 1.30  | -                                                | -                           | -         | -      |
| ORF157   | 99.15 | 98.03 | 0.94 | 1.79  | -                                                | -                           | -         | -      |
| ORF113   | 97.85 | 97.96 | 2.06 | 2.60  | -                                                | NRDD superfamily            | 5.49E-149 | 330954 |
| ORF174   | 97.92 | 97.76 | 8.27 | 8.40  | -                                                | TSorf172                    | 1.47E-04  | 313714 |
| ORF91    | 97.11 | 97.59 | 2.66 | 2.23  | -                                                | -                           | -         | -      |
| ORF92    | 96.81 | 97.49 | 3.76 | 2.96  | -                                                | -                           | -         | -      |
| ORF161   | 94.88 | 97.41 | 6.15 | 3.11  | -                                                | -                           | -         | -      |
| ORF35    | 99.45 | 97.16 | 1.10 | 5.70  | -                                                | -                           | -         | -      |
| ORF87    | 94.86 | 97.13 | 4.65 | 2.77  | -                                                | -                           | -         | -      |
| ORF119   | 97.97 | 97.12 | 2.17 | 2.95  | -                                                | -                           | -         | -      |
| ORF86    | 94.49 | 97.05 | 5.22 | 2.98  | -                                                | -                           | -         | -      |
| ORF85    | 94.13 | 96.50 | 7.18 | 4.47  | -                                                | -                           | -         | -      |
| ORF159   | 96.66 | 96.04 | 3.20 | 3.89  | -                                                | BF2867_like_C               | 2.18E-03  | 240526 |
| ORF104   | 96.45 | 96.00 | 5.71 | 6.21  | -                                                | -                           | -         | -      |
| ORF221   | 95.99 | 95.40 | 5.24 | 5.88  | -                                                | -                           | -         | -      |
| ORF97    | 95.94 | 95.27 | 6.13 | 6.91  | -                                                | PP-binding superfamily      | 1.14E-07  | 324546 |
| ORF5     | 99.32 | 92.28 | 0.85 | 10.28 | -                                                | GIY-YIG_SF superfamily      | 5.49E-03  | 326551 |
| ORF114   | 91.57 | 91.83 | 6.46 | 6.32  | -                                                | Radical_SAM superfamily     | 1.93E-74  | 327492 |

Table S1: Core-genome information. The data for each ORF represented in Figure 4 is listed in columns 2 and 3. Columns 4 and 5 contain the standard deviations for those pairwise similarity values. The other columns contain information about putative gene function and conserved domain homology.
